# Supplementary material for: An Open Standard for Camera Trap Data
Source: Biodivers Data J. 2016 Dec 6;(4):e10197. doi: 10.3897/BDJ.4.e10197 (PMC5267527; doi:10.3897/BDJ.4.e10197)
Supplement: Supplementary material 3 — JSON template for camera trap metadata standard [file biodiversity_data_journal-4-e10197-s003.json]

{ "CameraTrapMetadataStandard": {
    "ProjectID": " ",
    "ProjectName": " ",
    "ProjectObjectives": " ",
    "ProjectDesign": " ",
    "CountryCode": " ",
    "PublishDate": " ",
    "ProjectDataAccessandUseConstraints": " ",
    "PrincipalInvestigators": {
      "PrincipalInvestigator": {
        "PrincipalInvestigatorName": " ",
        "PrincipalInvestigatorEmail": " "
      }
    },
    "ProjectContacts": {
      "ProjectContact": {
        "ProjectContactName": " ",
        "ProjectContactEmail": " "
      }
    },
    "OrganizationName": " ",
    "CameraDeploymentID": " ",
    "CameraSiteName": " ",
    "CameraDeploymentBeginDate": " ",
    "CameraDeploymentEndDate": " ",
    "DeploymentLocationID": " ",
    "QuietPeriodSetting": " ",
    "ActualLatitude": " ",
    "ActualLongitude": " ",
    "CameraMake": " ",
    "Bait": " ",
    "Feature": " ",
    "CameraStatus": " ",
    "Other": " ",
    "ImageSequence": {
      "ImageSequenceID": " ",
      "ImageSequenceBeginTime": " ",
      "ImageSequenceEndTime": " ",
      "SequenceIdentificationsBy": { "sequenceIdentifiedBy": " " },
      "SequenceIdentifications": {
        "Identification": {
          "SpeciesScientificName": " ",
          "Count": " "
        }
      }
    },
    "Image": {
      "ImageID": " ",
      "ImageDateTime": " ",
      "PhotoType": " ",
      "PhotoTypeIdentifications": { "PhotoTypeIdentifiedBy": " " },
      "ImageIdentifications": {
        "Identification": {
          "SpeciesScientificName": " ",
          "Count": " "
        }
      }
    }
  }
}
